# Supplementary material for: Downregulation of IL-8 and IL-10 by the Activation of Ca2+-Activated K+ Channel KCa3.1 in THP-1-Derived M2 Macrophages
Source: MDPI journal article supplement (doi:10.3390/ijms23158603), 2022-08-03
Supplement: s1 [file s1]

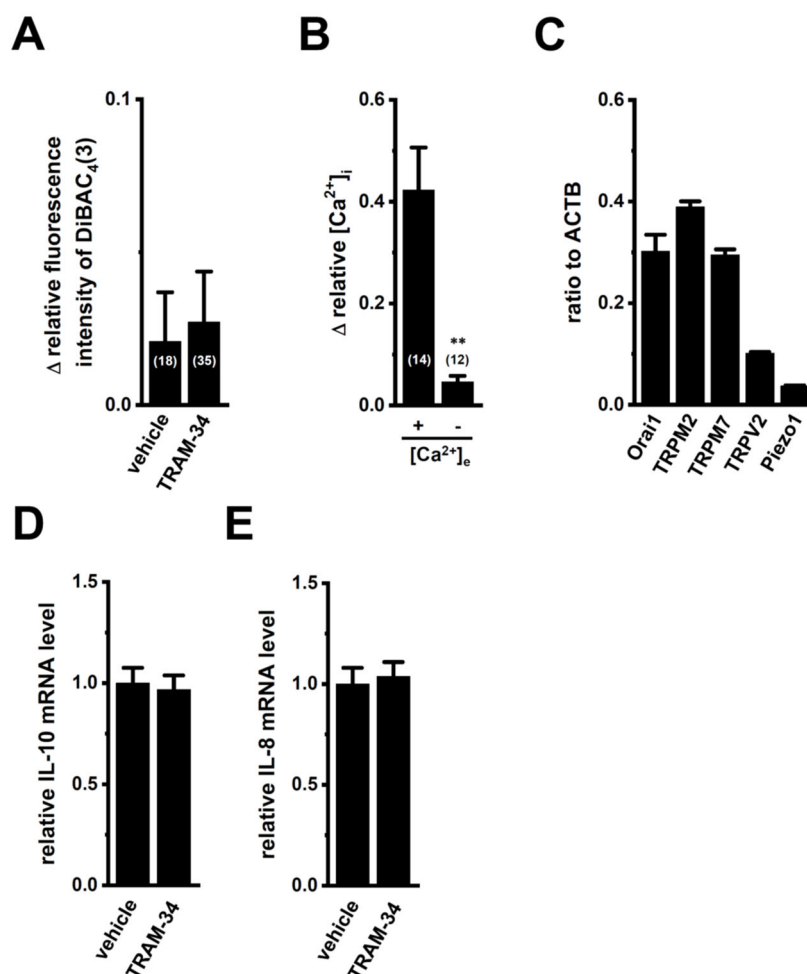

**Figure S1.** Effect of TRAM-34 on the membrane potential, SKA-121-induced  $[Ca^{2+}]_i$  change under  $Ca^{2+}$ -free condition, expression levels of  $Ca^{2+}$ -permeable channels, and effect of the treatment with TRAM-34 alone for 24-hr on the expression levels of IL-10 and IL-8 transcripts in THP-1-derived M<sub>2</sub> macrophages. A: TRAM-34 (1  $\mu$ M)-induced changes in the relative fluorescence intensity of DiBAC<sub>4</sub>(3) in THP-1-derived M<sub>2</sub> macrophages. Numbers used for experiments are shown in parentheses ( $p > 0.05$  vs. the vehicle control). B: SKA-121 (1  $\mu$ M)-induced changes in  $[Ca^{2+}]_i$  in the absence (-) or presence (+) of  $Ca^{2+}$  in the extracellular solution ( $[Ca^{2+}]_e$ ) in THP-1-derived M<sub>2</sub> macrophages. Numbers used for experiments are shown in parentheses (\*\*:  $p < 0.01$  vs. +  $[Ca^{2+}]_e$ ). C: Real-time PCR examination of Orai1, TRPM2, TRPM7, TRPV2, and Piezo1 expression in THP-1-derived M<sub>2</sub> macrophages. Expression levels are shown as a ratio to ACTB ( $n = 4$  for each). D, E: Effects of the treatment with TRAM-34 (10  $\mu$ M) for 24-hr on the expression levels of IL-10 (D) and IL-8 (E) transcripts in THP-1-derived M<sub>2</sub> macrophages. The expression level in the vehicle control was expressed as 1.0 ( $p > 0.05$ ,  $n = 4$  for each).

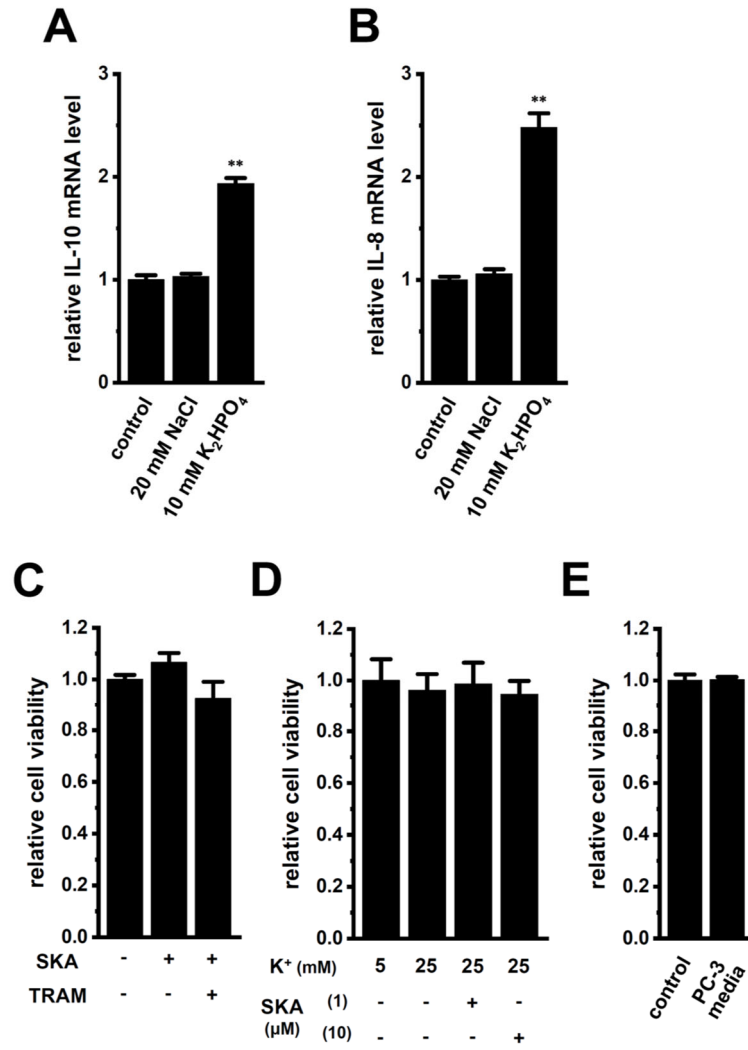

**Figure S2.** Effects of treatments with 20 mM NaCl and 10 mM  $K_2HPO_4$  on expression levels of IL-10 and IL-8 transcripts and effects of treatments with 1  $\mu$ M SKA-121, high  $[K^+]_e$  exposure, and PC-3 media on the viability of THP-1-derived M<sub>2</sub> macrophages. A, B: Real-time PCR examination of IL-10 (A) and IL-8 (B) expression in 20 mM NaCl and 10 mM  $K_2HPO_4$ -treated THP-1-derived M<sub>2</sub> macrophages for 24 hr. Relative mRNA expression in normal  $[K^+]_e$  (control) is expressed as 1.0 (n = 4 for each). C-E: Effects of the treatment with 1  $\mu$ M SKA-121 and/or 10  $\mu$ M TRAM-34 (C), the exposure to high  $[K^+]_e$  (25 mM) in the absence and presence of 1 or 10  $\mu$ M SKA-121 (D), and PC-3 media (E) for 24 hr on the viability of THP-1-derived M<sub>2</sub> macrophages. Cell viability in the vehicle control (-/- in 'C'), normal  $[K^+]_e$  (5 mM  $K^+$  in 'D'), or normal culture media (control in 'E') is expressed as 1.0 (n = 5 for each). \*\*:  $p < 0.01$  vs. the control.

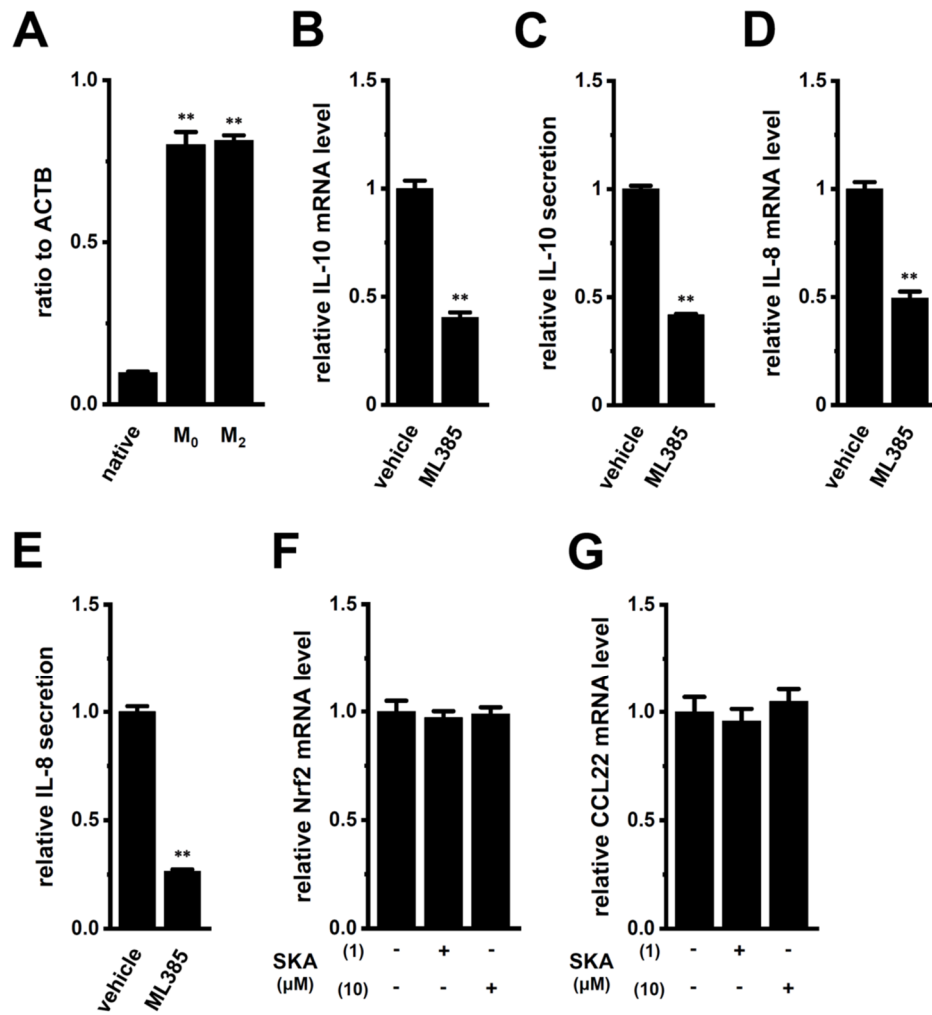

**Figure S3.** Effects of a treatment with a Nrf2 inhibitor on IL-10 and IL-8 expression and secretion and effects of a treatment with SKA-121 on Nrf2 and CCL22 expression in THP-1-derived M<sub>2</sub> macrophages. A: Real-time PCR examination of Nrf2 expression in native THP-1 ('native'), THP-1-derived M<sub>0</sub> macrophages ('M<sub>0</sub>'), and THP-1-derived M<sub>2</sub> macrophages ('M<sub>2</sub>'). Expression levels are shown as a ratio to ACTB (n = 4 for each). B, D: Real-time PCR examination of IL-10 (B) and IL-8 (D) expression in vehicle- and ML385 (10 μM)-treated THP-1-derived M<sub>2</sub> macrophages for 24 hr. C, E: Quantitative detection of IL-10 (C) and IL-8 (E) secretion by an ELISA assay in vehicle- and ML385 (10 μM)-treated THP-1-derived M<sub>2</sub> macrophages for 24 hr (n = 4 for each). F, G: Real-time PCR examination of Nrf2 (F) and CCL22 (G) expression in THP-1-derived M<sub>2</sub> macrophages treated (+) or untreated (-) with 1 and 10 μM SKA-121 for 24 hr. Relative mRNA expression in the vehicle control (-/-) is expressed as 1.0 (B, D, F, G) (n = 4 for each). \*\*: *p* < 0.01 vs. 'native' and the vehicle control.
